# Supplementary material
Source: publisher figshare collection journal article supplement (https://tandf.figshare.com/articles/dataset/_/5678839)
Supplement: Supplementary file 1 [file 1]

## Supporting Information (SI)

### Enclosure design for flock-level, chronic exposure of birds to air contaminant mixtures

Michelle A. North <sup>\*,†</sup>, David W. Kinniburgh <sup>‡</sup> and Judit E. G. Smits <sup>±</sup>

#### Alberta Centre for Toxicology Methods for Analysing Passive Samplers

These method summaries are included with permission from the Alberta Centre for Toxicology (ACFT), and include preparation, deployment, and methods of analysing Ogawa samplers (NO<sub>2</sub> and SO<sub>2</sub>, Ogawa, USA) and 3M VOC samplers (Organic Vapor Diffusion Monitor 3500, 3M<sup>TM</sup>, USA), that were used during the research detailed in this thesis. O<sub>3</sub> is included in the methods because it forms part of the ACFT methods, but is not relevant to this thesis. Sampler assembly is per manufacturer instructions and not included here.

#### SI.1. Ogawa Air Sampler Method Summary - SO<sub>2</sub>, NO<sub>2</sub> and O<sub>3</sub>

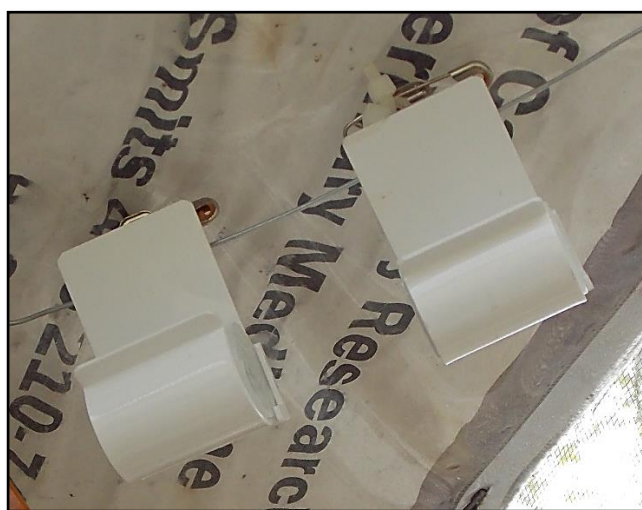

Figure SI.1. Ogawa passive samplers used to measure NO<sub>2</sub> and SO<sub>2</sub> in this study

### ***SI.1.1. Preparation and use procedure***

To prepare the blank monitor to use:

- A blank monitor should be included with each set of samples to check for any contamination of the samples. The blank should be opened when the sample is opened.
- Remove a Sampler ID# label and place it on the “Passive Samplers – Log Sheet for Deployment” form enclosed with the monitor.
- Remove the monitor from the brown storage bottle and the re-sealable bag, and then immediately place back in the bag and in the bottle.
- Close the storage bottle with the lid provided.
- Store the blank monitor refrigerated (4°C) while other monitors are being deployed.

To prepare the monitor for use:

- Remove a Sampler ID# label and place it on the “Passive Samplers – Log Sheet for Deployment” form.
- Record the following information on the form “Passive Samplers – Log Sheet for Deployment”:
  - Participant ID#
  - Sampling Start Date
  - Comments (e.g., temperature, relative humidity, rain, etc.)
- Remove the sampler from the re-sealable bag. Secure the sampler in the desired location.
  - As a personal monitor, it should be worn near the worker’s breathing zone (e.g., front of the shirt collar).
  - As an area monitor, hang it away from walls, corners, table tops or other regions where air movement in the area may be limited.
- Replace the re-sealable bag in the brown storage bottle and tighten the cap securely. Retain it for later use.

To prepare the monitor at the end of sampling:

- Remove the sampler from the sampling location and place it in the re-sealable bag, then in the brown storage bottle, and tighten the cap securely.
- Record the Sampling End Date and Sampling End Time. Ensure the “Passive Samplers – Log Sheet for Deployment” form is filled out appropriately.
- Transport the monitor(s), the blank and the completed form to ACFT within 48 hours. Store the monitors in refrigerator (4°C) if delay is anticipated

### ***SI.1.2. Laboratory analysis***

Adapted from: F14027 Ogawa Air Sampler Method Summary Version 140505

#### **Introduction:**

Alberta Centre for Toxicology (ACFT) purchases the Ambient Air Passive Air Samplers and Collection Pads for SO<sub>2</sub>, NO<sub>2</sub>, and O<sub>3</sub> from the Ogawa & Co. ACFT washes all the reusable sampler parts and assembles the pads into the samplers. Exposed samplers are analyzed at ACFT or RTI International (3040 Cornwallis Road, Bldg 6, RTP, NC 27709).

#### **Air Sampler Extraction at (ACFT):**

*SO<sub>2</sub> Samplers:* Each sampler is disassembled and the pad is removed from the holder. The pad is placed in a culture tube. A volume of 5 mL of extraction solvent (Type I water with 2 µg/mL HPO<sub>4</sub><sup>2-</sup> as internal standard) is added to the tube using a Brinkman bottle top dispenser. The culture tube is then capped and inverted every 5 minutes for 30 minutes. After 30 minutes, 60 µL of 30% hydrogen peroxide is pipetted into the culture tube. The tube is inverted slowly every half an hour for 2 hours. Two mL of the extract is transferred into a Dionex IC vial, capped, and injected on the Dionex IC along with a set of calibrators and controls.

*NO<sub>2</sub> Samplers:* Each sampler is disassembled and the pad is removed from the holder. The pad is placed in a culture tube. A volume of 8 mL of extraction solvent (Type I water with 2 µg/mL HPO<sub>4</sub><sup>2-</sup> as internal standard) is added to the tube using a Brinkman

bottle top dispenser. The culture tube is capped and placed on a tube rocker to shake for 15 minutes. Approximately 1.5 mL of the extract is transferred into a Dionex IC vial, capped, and injected on the Dionex IC along with a set of calibrators and controls.

*O<sub>3</sub> Samplers:* Each sampler is disassembled and the two pads are removed from the holder. The pads are placed in a culture tube. A volume of 5 mL of extraction solvent (Type I water with 2 µg/mL HPO<sub>4</sub><sup>2-</sup> as internal standard) is added to the tube using a Brinkman bottle top dispenser. The culture tube is capped and placed on a tube rocker to shake for 15 minutes. Approximately 1.5 mL of the extract is transferred into a Dionex IC vial, capped, and injected on the Dionex IC along with a set of calibrators and controls.

#### Analysis of Ogawa Air Sampler Extractions at ACFT:

Ion Chromatography in conjunction with chemical suppression and conductivity detection is used for the separation and determination of the anions in Passive Air Samplers. The system used is a Dionex DX500 Ion Chromatograph comprised of the following: a Dionex LC25 chromatography even, a Dionex AS40 automated sampler, a Dionex CD20 conductivity detector, a Dionex GP40 gradient pump, as well as a Metrohm 753 suppressor module.

Separation of the anions is performed on a Dionex IonPac AS12A analytical column (4 x 200 mm) using a Dionex IonPac AG12A guard column (4 x 50 mm). The mobile phase consists of 2.7 mM sodium carbonate (Na<sub>2</sub>CO<sub>3</sub>) and 0.3 mM sodium bicarbonate (NaHCO<sub>3</sub>), which is filtered through a 0.22 µm filter. 100 µL of sample is injected onto the IC column with a flow rate of 1.5 mL/min. Data is collected over an 11 minutes run time. The anions are identified according to their retention times and elution order. An internal calibration is used to determine the anion concentrations.

The anions detected are (in order of elution):

1. Nitrite ( $\text{NO}_2^-$ ): for the  $\text{NO}_2$  Passive Samplers
2. Nitrate ( $\text{NO}_3^-$ ): for the  $\text{O}_3$  Passive Samplers
3. Sulfate ( $\text{SO}_4^{2-}$ ): for the  $\text{SO}_2$  Passive Samplers

### ***SI.1.3. Data Analysis at ACFT***

The results are collected as a concentration in  $\mu\text{g/mL}$  and converted into ng/sampler by multiplying the concentration measured by the amount of extraction solvent used in the extraction and a conversion factor of 1000 to give concentrations in ng/sampler.

- For  $\text{SO}_2$ ,  $\text{SO}_4$  concentration (ng/sampler) =  $\text{SO}_4$  ( $\mu\text{g/mL}$ ) \* 5 (mL) \* 1000
- For  $\text{NO}_2$ ,  $\text{NO}_2$  concentration (ng/sampler) =  $\text{NO}_2$  ( $\mu\text{g/mL}$ ) \* 8 (mL) \* 1000
- For  $\text{O}_3$ ,  $\text{NO}_3$  concentration (ng/sampler) =  $\text{NO}_3$  ( $\mu\text{g/mL}$ ) \* 5 (mL) \* 1000

**LOQ:** The limit of quantitation for this method is 0.1  $\mu\text{g/mL}$  for Nitrite ( $\text{NO}_2^-$ ), Nitrate ( $\text{NO}_3^-$ ), and Sulfate ( $\text{SO}_4^{2-}$ ). Value below 0.1  $\mu\text{g/mL}$  will be reported as information only for research study.

**Linearity:** This method is linear up to 50  $\mu\text{g/mL}$  for the anions. Dilutions are performed on any sample with a concentration greater than 50  $\mu\text{g/mL}$ .

### ***SI.1.4. Data Analysis at RIT International***

The equations for calculating concentration in ppb (by volume) are based on the following protocols from the Ogawa website [www.ogawausa.com](http://www.ogawausa.com) and they are attached as references with this summary:

1.  $\text{NO}$ ,  $\text{NO}_2$ ,  $\text{NO}_x$  AND  $\text{SO}_2$  SAMPLING PROTOCOL USING THE OGAWA SAMPLER (PAGE 23, 28)
2. PROTOCOL FOR OZONE MEASUREMENT USING THE OZONE PASSIVE SAMPLER BADGE (PAGE 14)

From protocol 1 (page 23),  $\text{SO}_2$  concentration (ppb) =  $\alpha\text{SO}_2 * \text{WSO}_2 / t$

where:

- $W_{SO_2}$  is the sulfate quantity (in ng) collected on the  $SO_2$  sampler multiplying the molecular weight of  $SO_2$  and divided by molecular weight of  $SO_4$ .
- $W_{SO_2} = W_{SO_4} \text{ (in ng)} * 64.062/96.06$  (Molecular weight of  $SO_2 = 64.062$  g/mole; Molecular weight of  $SO_4 = 96.06$  g/mole)
- $\alpha_{SO_2}$  is the ppb concentration conversion coefficients (ppb-min/ng). At 20°C the value of  $\alpha_{SO_2} = 39$ .
- $t$  is sample collection time in minutes.

From protocol 1 (page 28),  $NO_2$  concentration (ppb) =  $\alpha_{NO_2} * W_{NO_2} / t$

where:

- $W_{NO_2}$  is the nitrite quantity (in ng) collected on the  $NO_2$  sampler,
- $\alpha_{NO_2}$  is the ppb concentration conversion coefficients (ppb-min/ng). At 20°C the value of  $\alpha_{NO_2} = 56$ .
- $t$  is sample collection time in minutes.

From protocol 2 (page 14),  $O_3$  concentration (ppb) =  $(18.09) * 1000 * W_{NO_3} / t$

where:

- $W_{NO_3}$  is the nitrate quantity (in  $\mu g$ ) collected on the  $O_3$  sampler,
- 18.09 is the conversion coefficient from  $NO_3$  to  $O_3$ . Derivation of this coefficient is detailed on page 14.
- “1000” is the conversion factor from ppm to ppb.
- $t$  is sample collection time in minutes.

## SI.2. Volatile Organic Compounds (VOC) in Air Sampler Method Summary

3M™ Organic Vapor Diffusion Monitor 3500 (Figure A-2)

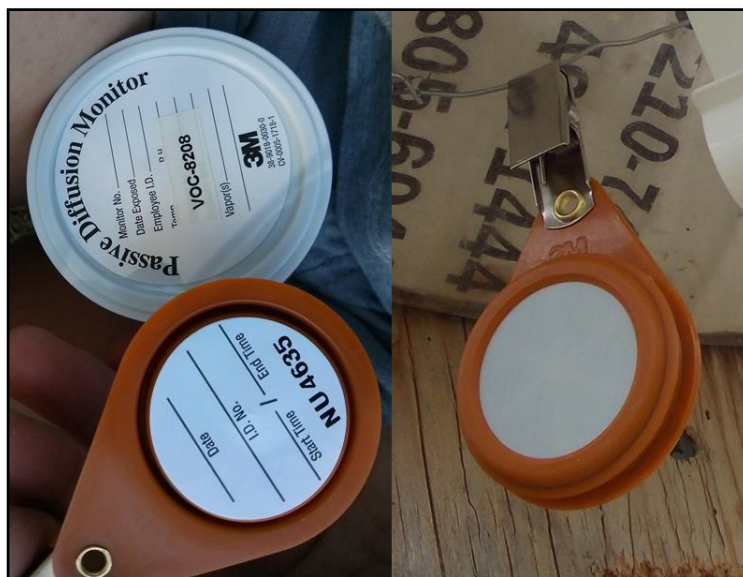

**Figure SI.2. 3M™ Organic Vapor Diffusion Monitor 3500 used for measuring VOC concentrations in this study**

### *SI.2.1. Preparation and use procedure*

To prepare the blank monitor to use:

- A blank monitor should be included with each set of samples to check for any contamination of the samples. The blank should be opened when the sample is opened.
- Remove a Sampler ID# label and place it on the back of the monitor.
- Remove another Sampler ID# label and place it on the “Passive Samplers – Log Sheet for Deployment” form enclosed with the monitor.
- Remove the plastic ring and white film from the monitor. Immediately snap the elution cap (with plugs) onto the main monitor body. Be sure the two port plugs are secured.
- Return the blank monitor into the can and close the can with the plastic lid provided.
- Store the blank monitor refrigerated (4°C) while other monitors are being deployed.

To prepare the monitor for use:

- Remove a Sampler ID# label and place it on the back of the monitor.
- Remove another Sampler ID# label and place it on the “Passive Samplers – Log Sheet for Deployment” form enclosed with the monitor.
- Record the following information on the form “Passive Samplers – Log Sheet for Deployment”:
  - Participant ID#
  - Sampling Start Date
  - Comments (e.g. temperature, relative humidity, rain, etc.)
- DO NOT remove the white film and plastic ring. Secure the monitor in the desired location.
- As a personal monitor, it should be worn near the worker’s breathing zone (e.g. front of the shirt collar).
- As an area monitor, hang it away from walls, corners, table tops or other regions where air movement in the area may be limited.
- Close the can with the plastic lid provided. Retain it for later use.

To prepare the monitor at the end of sampling:

- Remove the plastic ring and white film from the monitor. Immediately snap the elution cap (with plugs) onto the main monitor body. Be sure the two port plugs are secured. Return the monitor to the can. Close the can with the plastic lid provided.
- Record the Sampling End Date and Sampling End Time. Ensure the “Passive Samplers – Log Sheet for Deployment” form is filled out appropriately.
- Transport the monitor(s), the blank and the completed form to ACFT within 48 hours. Store the monitors in refrigerator (4°C) if delay is anticipated.

### ***SI.2.2. Laboratory analysis***

VOC Sample Extraction:



Each passive monitor is filled with 1.5 mL of carbon disulfide solvent and allowed to sit for 30 minutes. The carbon disulfide is then transferred from the badge into a glass vial and securely capped.

#### Analysis of VOCs:

The samples are injected onto a gas chromatograph (GC) for compound separation followed by detection by a mass spectrometer (MS). The system used is a Hewlett-Packard GC-6890/MS-5973. Separation is performed on an HP 19091V-402 capillary column, 25m x 200 $\mu$ m x 1.12 $\mu$ m at an oven temperature range of 40°C - 140°C. Total run time is 17.5 minutes and sample injection volume is 1 $\mu$ L.

The following compounds are detected:

- Hexane
- 3-Methylhexane
- Benzene
- Heptane
- Toluene
- Octane
- Ethylbenzene
- m,p-Xylenes
- Nonane
- o-Xylene
- n-Propylbenzene
- Decane
- Limonene
- n-Butylbenzene

#### ***SI.2.3. Data analysis***

**Calculations:** The GC/MS gives VOC concentrations in  $\mu$ g/mL. These concentrations are multiplied by the extraction volume of 1.5 mL and a conversion factor of 1000 to give concentrations in ng/badge.

The formula for converting ng/badge to  $\mu\text{g}/\text{m}^3$  is

$$\text{Analyte } (\mu\text{g}/\text{m}^3) = \frac{\text{Analyte concentration (ng/badge)} \times 1000}{\text{Time exposed (min)} \times \text{Sampling Rate (mL/min)}}$$

Where Time exposed for a 7 day period = 10080 min

| Compound        | Sampling Rate from 3M Manufacturer (mL/min) | LOQ (ng/badge) | LOQ for 7-day Exposed Period ( $\mu\text{g}/\text{m}^3$ ) |
|-----------------|---------------------------------------------|----------------|-----------------------------------------------------------|
| Hexane          | 32.0                                        | 150            | 0.47                                                      |
| Methylhexane    | 28.9                                        | 150            | 0.51                                                      |
| Benzene         | 35.5                                        | 150            | 0.42                                                      |
| Heptane         | 28.9                                        | 150            | 0.51                                                      |
| Toluene         | 31.4                                        | 150            | 0.47                                                      |
| Octane          | 26.6                                        | 150            | 0.56                                                      |
| Ethylbenzene    | 27.3                                        | 150            | 0.55                                                      |
| m,p-Xylenes     | 27.3                                        | 300            | 1.09                                                      |
| o-Xylene        | 27.3                                        | 150            | 0.55                                                      |
| Nonane          | 24.6                                        | 150            | 0.60                                                      |
| Decane          | 23.1                                        | 150            | 0.64                                                      |
| Limonene        | 21.9                                        | 150            | 0.68                                                      |
| N-Propylbenzene | 24.6                                        | 150            | 0.60                                                      |
| N-Butylbenzene  | 22.4                                        | 150            | 0.66                                                      |

**LOQ:** The limit of quantitation for this method is  $0.2\mu\text{g}/\text{mL}$  for *m,p*-Xylenes and  $0.1\mu\text{g}/\text{mL}$  for the remaining compounds. Any value below  $0.1\mu\text{g}/\text{mL}$  is reported as  $0\mu\text{g}/\text{mL}$ . The method detection limit for *m,p*-Xylenes is 300 ng/sampler and 150 ng/sampler for the remaining VOC's.

**Linearity:** This method is linear up to  $50\mu\text{g}/\text{mL}$  for all compounds. Dilutions are performed on any sample with a concentration greater than  $50\mu\text{g}/\text{mL}$ .
